# Supplementary material for: Stereochemistry and miscibility of epoxy resin–poly(trimethylene terephthalate) blends
Source: Royal Society of Chemistry journal article supplement (doi:10.1039/c4ra01429d), 2014-01-01
Supplement: c4ra01429d1.pdf [file c4ra01429d1.pdf]

## Supplementary evidence

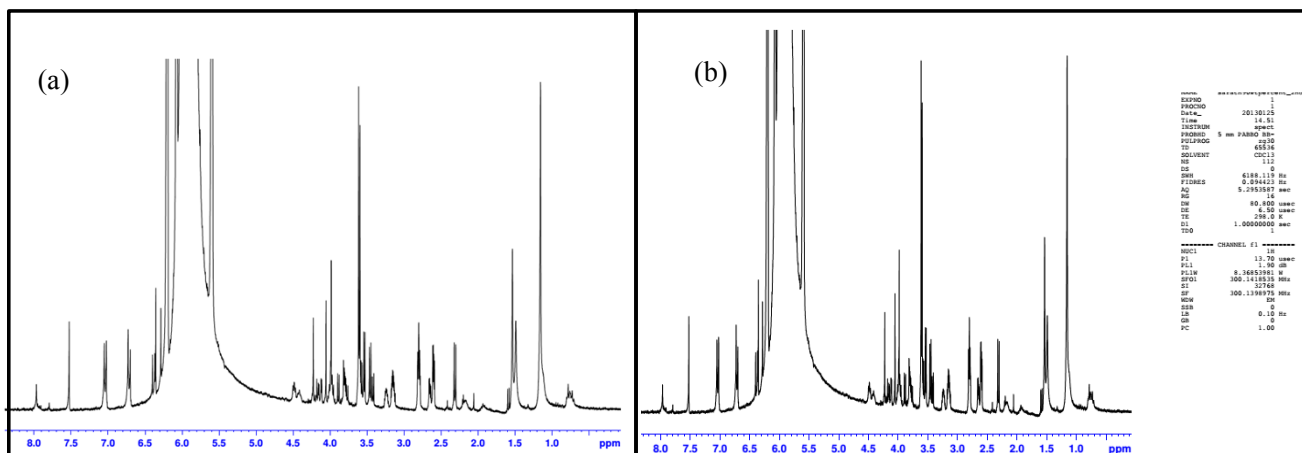

Figure 1: Results of the NMR experiment for 90 % w/w blend using 1,1,2,2, tetrachloro ethane as solvent. The solution was made by mixing at 150 °C for 20 min
